# Supplementary material
Source: PubMed Central journal article supplement (PMC6965682)
Supplement: BPH-176-4745-s002.pdf [file BPH-176-4745-s002.pdf]

**Table S2** primary antibodies for proteins

| Protein Name        | Company     | Dilution | Molecular Weight |
|---------------------|-------------|----------|------------------|
| $\alpha$ -SMA       | CST         | 1:1000   | 42 kDa           |
| Type I collagen     | Bioworld    | 1:1000   | 139 kDa          |
| Type III collagen   | Bioworld    | 1:1000   | 138 kDa          |
| E-cadherin          | CST         | 1:1000   | 130 kDa          |
| Vimentin            | Bioworld    | 1:1000   | 57 kDa           |
| N-cadherin          | CST         | 1:1000   | 150 kDa          |
| c-Myc               | Abcam       | 1:1000   | 65 kDa           |
| cyclin D1           | CST         | 1:1000   | 36 kDa           |
| Bcl-2               | CST         | 1:1000   | 26 kDa           |
| Bax                 | CST         | 1:1000   | 20 kDa           |
| p21                 | Santa Cruz  | 1:1000   | 21 kDa           |
| p27                 | Santa Cruz  | 1:1000   | 27 kDa           |
| p38                 | CST         | 1:1000   | 38 kDa           |
| p-p38               | CST         | 1:1000   | 38 kDa           |
| p44/42              | CST         | 1:1000   | 44/42 kDa        |
| p-p44/42            | CST         | 1:1000   | 44/42 kDa        |
| WNT                 | Bioworld    | 1:1000   | 42 kDa           |
| $\beta$ -catenin    | CST         | 1:1000   | 92 kDa           |
| p- $\beta$ -catenin | CST         | 1:1000   | 92 kDa           |
| Akt                 | Bioworld    | 1:1000   | 60 kDa           |
| p-Akt               | Bioworld    | 1:1000   | 60 kDa           |
| JAK2                | CST         | 1:1000   | 125 kDa          |
| p-JAK2              | CST         | 1:1000   | 125 kDa          |
| STAT3               | CST         | 1:1000   | 86 kDa           |
| p-STAT3             | CST         | 1:1000   | 86 kDa           |
| TGF- $\beta$ 1      | Proteintech | 1:1000   | 44 kDa           |
| TGF- $\beta$ 1R     | Proteintech | 1:1000   | 42 kDa           |
| Smad2/3             | Bioworld    | 1:1000   | 55/60 kDa        |
| p-Smad2             | Bioworld    | 1:1000   | 60 kDa           |
| p-Smad3             | Bioworld    | 1:1000   | 55 kDa           |
| GAPDH               | Bioworld    | 1:8000   | 36 kDa           |
